# Supplementary material
Source: PubMed Central journal article supplement (PMC9125742)

Online supplemental figures:

Supplemental Figure S1:

# Study Design

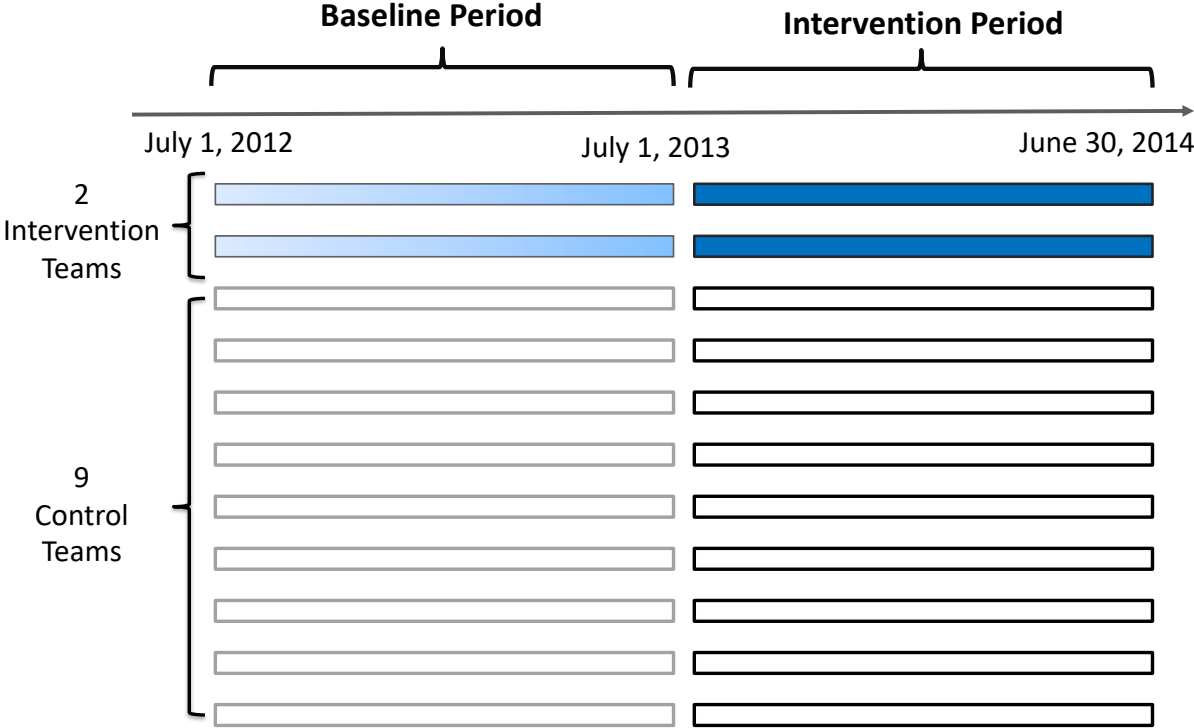

Supplemental Figure S2:

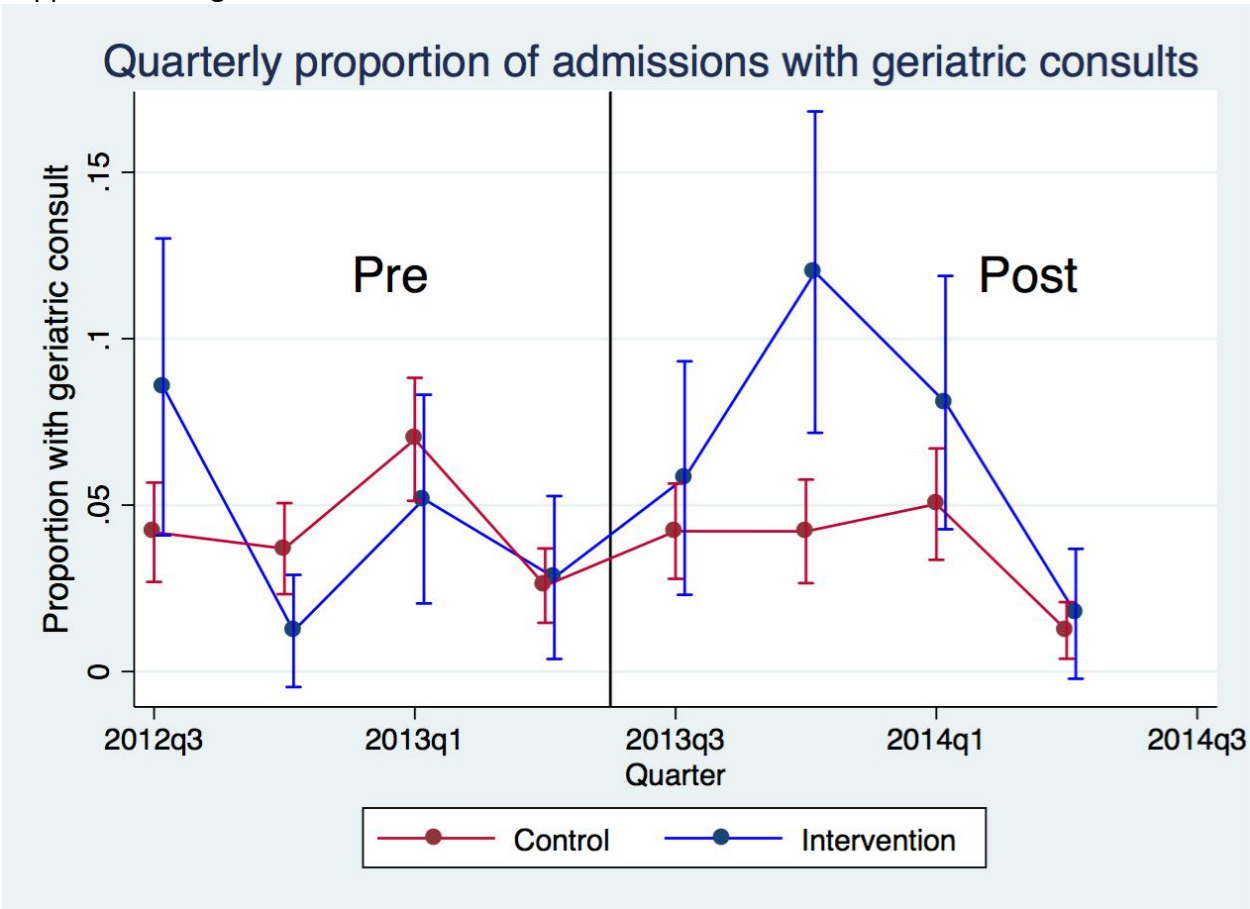

Supplement: NIHMS1801437-supplement-1.pdf [file NIHMS1801437-supplement-1.pdf]
